# Supplementary material for: Transcriptomic and Functional Studies of the RGS Protein Rax1 in Aspergillus fumigatus
Source: MDPI journal article supplement (doi:10.3390/pathogens9010036), 2019-12-31
Supplement: s1 [file s1]

**Table S2.** Down-regulated genes in *ΔraxI* relative to WT (> 2.0-fold,  $p < 0.05$ ).

| Gene name    | Log <sub>2</sub> FC | <i>p</i> -value | <i>q</i> -value | Protein product | Protein name                                        |
|--------------|---------------------|-----------------|-----------------|-----------------|-----------------------------------------------------|
| AFUA_6G09680 | -10.83              | 0.000           | 0.000           | XP_750857.2     | O-methyltransferase GliM                            |
| AFUA_7G04850 | -6.67               | 0.000           | 0.022           | XP_749025.1     | aldo-keto reductase                                 |
| AFUA_3G03570 | -6.02               | 0.000           | 0.000           | XP_748677.1     | 67 kDa myosin-cross-reactive antigen family protein |
| AFUA_7G05080 | -5.63               | 0.000           | 0.001           | XP_749002.1     | C6 transcription factor                             |
| AFUA_7G06270 | -5.28               | 0.000           | 0.000           | XP_748883.1     | cyanamide hydratase                                 |
| AFUA_3G10850 | -4.92               | 0.000           | 0.011           | XP_754534.1     | DUF821 domain protein                               |
| AFUA_7G05560 | -4.71               | 0.000           | 0.029           | XP_748953.1     | hypothetical protein AFUA_7G05560                   |
| AFUA_3G00950 | -4.27               | 0.000           | 0.000           | XP_748416.1     | ankyrin repeat protein                              |
| AFUA_3G03290 | -4.22               | 0.000           | 0.000           | XP_748648.1     | conserved hypothetical protein                      |
| AFUA_3G03560 | -3.92               | 0.000           | 0.000           | XP_748676.1     | pyridine nucleotide-disulfide oxidoreductase        |
| AFUA_7G05190 | -3.90               | 0.007           | 0.000           | XP_748990.1     | MFS alpha-glucoside transporter                     |
| AFUA_3G13120 | -3.29               | 0.000           | 0.000           | XP_754310.1     | porphobilinogen deaminase Hem3                      |
| AFUA_2G14547 | -3.28               | 0.000           | 0.004           | XP_001481679.1  | conserved hypothetical protein                      |
| AFUA_3G00370 | -3.19               | 0.000           | 0.000           | XP_748359.1     | phosphoketolase                                     |
| AFUA_8G01530 | -3.09               | 0.000           | 0.020           | XP_747053.1     | HHE domain protein                                  |
| AFUA_3G07410 | -3.05               | 0.000           | 0.000           | XP_754868.1     | isoamyl alcohol oxidase                             |
| AFUA_4G00440 | -2.97               | 0.000           | 0.020           | XP_746412.1     | short chain dehydrogenase                           |
| AFUA_7G05160 | -2.96               | 0.002           | 0.000           | XP_748993.2     | fumarylacetoacetate hydrolase family protein        |
| AFUA_7G04630 | -2.94               | 0.000           | 0.000           | XP_749047.1     | hypothetical protein AFUA_7G04630                   |
| AFUA_3G14140 | -2.90               | 0.000           | 0.025           | XP_754211.1     | metacaspase CasB                                    |
| AFUA_7G01050 | -2.82               | 0.004           | 0.038           | XP_746826.1     | salicylate hydroxylase                              |

|              |       |       |       |                |                                                     |
|--------------|-------|-------|-------|----------------|-----------------------------------------------------|
| AFUA_7G05490 | -2.80 | 0.000 | 0.004 | XP_748960.1    | conserved hypothetical protein                      |
| AFUA_2G17630 | -2.77 | 0.001 | 0.034 | XP_756098.1    | conserved hypothetical protein                      |
| AFUA_3G01960 | -2.74 | 0.000 | 0.002 | XP_748516.1    | conserved hypothetical protein                      |
| AFUA_3G01900 | -2.68 | 0.000 | 0.000 | XP_748510.2    | conserved hypothetical protein                      |
| AFUA_5G09970 | -2.63 | 0.000 | 0.035 | XP_753643.2    | 67 kDa myosin-cross-reactive antigen family protein |
| AFUA_3G13620 | -2.60 | 0.000 | 0.000 | XP_754262.2    | cupin domain protein                                |
| AFUA_7G05015 | -2.58 | 0.000 | 0.045 | XP_001481428.1 | glyoxalase family protein                           |
| AFUA_3G11070 | -2.48 | 0.000 | 0.041 | XP_754512.1    | pyruvate decarboxylase PdcA                         |
| AFUA_3G03220 | -2.46 | 0.000 | 0.000 | XP_748641.1    | conserved hypothetical protein                      |
| AFUA_7G06940 | -2.45 | 0.010 | 0.030 | XP_748816.1    | fungus specific transcription factor                |
| AFUA_8G06590 | -2.37 | 0.001 | 0.005 | XP_747460.1    | hypothetical protein AFUA_8G06590                   |
| AFUA_8G02280 | -2.32 | 0.001 | 0.009 | XP_746978.1    | C6 transcription factor                             |
| AFUA_5G15060 | -2.09 | 0.000 | 0.000 | XP_753151.1    | terpene synthase family protein                     |
| AFUA_3G00540 | -2.05 | 0.000 | 0.001 | XP_748374.1    | MFS peptide transporter                             |
| AFUA_5G10020 | -1.96 | 0.000 | 0.000 | XP_753639.1    | sensor histidine kinase/response regulator          |
| AFUA_8G01820 | -1.94 | 0.018 | 0.007 | XP_001481397.1 | hypothetical protein AFUA_8G01820                   |
| AFUA_5G15000 | -1.94 | 0.000 | 0.000 | XP_753157.1    | arsenate reductase ArsC                             |
| AFUA_3G01590 | -1.93 | 0.000 | 0.001 | XP_748480.1    | conserved hypothetical protein                      |
| AFUA_4G03280 | -1.92 | 0.022 | 0.023 | XP_746514.1    | short-chain dehydrogenase/reductase family protein  |
| AFUA_4G13860 | -1.92 | 0.000 | 0.000 | XP_751446.2    | extracellular salicylate hydroxylase/monooxygenase  |
| AFUA_7G01000 | -1.91 | 0.013 | 0.005 | XP_746831.1    | aldehyde dehydrogenase                              |
| AFUA_8G01870 | -1.90 | 0.048 | 0.000 | XP_747019.1    | hypothetical protein AFUA_8G01870                   |
| AFUA_3G02570 | -1.87 | 0.000 | 0.000 | XP_748578.1    | polyketide synthase                                 |

|              |       |       |       |                |                                          |
|--------------|-------|-------|-------|----------------|------------------------------------------|
| AFUA_4G01322 | -1.85 | 0.001 | 0.000 | XP_746325.2    | C6 transcription factor                  |
| AFUA_8G04510 | -1.84 | 0.000 | 0.000 | XP_747258.1    | pirin                                    |
| AFUA_3G11840 | -1.83 | 0.000 | 0.000 | XP_754437.1    | NAD binding Rossmann fold oxidoreductase |
| AFUA_8G06280 | -1.82 | 0.040 | 0.000 | XP_747429.1    | casein kinase family protein             |
| AFUA_6G02360 | -1.81 | 0.009 | 0.004 | XP_747841.1    | conserved hypothetical protein           |
| AFUA_4G00910 | -1.77 | 0.013 | 0.000 | XP_746365.2    | short chain oxidoreductase (CsgA)        |
| AFUA_1G17020 | -1.77 | 0.000 | 0.014 | XP_753070.1    | UDP-glucose dehydrogenase                |
| AFUA_5G00300 | -1.77 | 0.002 | 0.000 | XP_748310.1    | zinc-binding oxidoreductase              |
| AFUA_8G02100 | -1.76 | 0.001 | 0.021 | XP_746996.1    | beta-glucosidase                         |
| AFUA_6G02400 | -1.74 | 0.002 | 0.018 | XP_747837.1    | MFS drug efflux pump                     |
| AFUA_2G01740 | -1.72 | 0.000 | 0.005 | XP_749309.1    | sulfate transporter                      |
| AFUA_4G00840 | -1.69 | 0.023 | 0.002 | XP_746372.1    | hypothetical protein AFUA_4G00840        |
| AFUA_6G14520 | -1.68 | 0.012 | 0.016 | XP_751326.1    | PTR family peptide transporter           |
| AFUA_1G16350 | -1.68 | 0.000 | 0.007 | XP_753001.1    | hypothetical protein AFUA_1G16350        |
| AFUA_1G17040 | -1.64 | 0.000 | 0.040 | XP_753072.1    | D-lactate dehydrogenase                  |
| AFUA_2G04190 | -1.62 | 0.000 | 0.041 | XP_749551.1    | conserved hypothetical protein           |
| AFUA_4G04318 | -1.61 | 0.000 | 0.027 | XP_001481547.1 | copper resistance protein Crd2           |
| AFUA_6G12120 | -1.56 | 0.044 | 0.003 | XP_751091.1    | BNR/Asp-box repeat domain protein        |
| AFUA_8G05600 | -1.53 | 0.002 | 0.000 | XP_747361.1    | conserved hypothetical protein           |
| AFUA_4G08970 | -1.52 | 0.000 | 0.007 | XP_751928.2    | PAP2 domain protein                      |
| AFUA_3G14710 | -1.50 | 0.009 | 0.003 | XP_754154.1    | toxin biosynthesis proten (Fum3)         |
| AFUA_1G13110 | -1.46 | 0.000 | 0.045 | XP_752681.1    | 4-coumarate-CoA ligase                   |
| AFUA_3G02060 | -1.45 | 0.000 | 0.012 | XP_748525.2    | MFS multidrug transporter                |

|              |       |       |       |             |                                                          |
|--------------|-------|-------|-------|-------------|----------------------------------------------------------|
| AFUA_7G04680 | -1.43 | 0.015 | 0.000 | XP_749042.1 | conserved hypothetical protein                           |
| AFUA_2G12500 | -1.41 | 0.000 | 0.003 | XP_755582.1 | MFS multidrug transporter                                |
| AFUA_3G06600 | -1.38 | 0.000 | 0.022 | XP_754946.1 | siroheme synthase                                        |
| AFUA_3G08450 | -1.38 | 0.000 | 0.000 | XP_754769.1 | hypothetical protein AFUA_3G08450                        |
| AFUA_2G17360 | -1.37 | 0.005 | 0.016 | XP_756071.1 | MFS monocarboxylate transporter (Mct)                    |
| AFUA_3G01670 | -1.29 | 0.005 | 0.000 | XP_748488.1 | MFS hexose transporter                                   |
| AFUA_3G10530 | -1.23 | 0.000 | 0.000 | XP_754566.1 | protein serine/threonine kinase (Ran1)                   |
| AFUA_6G00310 | -1.19 | 0.011 | 0.003 | XP_731524.1 | serine carboxypeptidase (CpdS)                           |
| AFUA_4G04670 | -1.19 | 0.001 | 0.000 | XP_746653.1 | calcium permease family membrane transporter             |
| AFUA_2G00880 | -1.19 | 0.005 | 0.000 | XP_749225.2 | C6 finger domain protein                                 |
| AFUA_2G04860 | -1.18 | 0.002 | 0.012 | XP_749617.1 | DNA repair protein Rad4                                  |
| AFUA_6G05350 | -1.17 | 0.002 | 0.021 | XP_747542.1 | aspartic-type endopeptidase (OpsB)                       |
| AFUA_5G12580 | -1.17 | 0.002 | 0.000 | XP_753395.1 | GTP binding protein (GTPBP1)                             |
| AFUA_6G12550 | -1.16 | 0.002 | 0.045 | XP_751133.1 | mitochondrial carrier protein                            |
| AFUA_3G00330 | -1.13 | 0.008 | 0.007 | XP_748355.2 | NAD dependent epimerase/dehydratase family protein       |
| AFUA_7G07010 | -1.11 | 0.020 | 0.000 | XP_748810.1 | hypothetical protein AFUA_7G07010                        |
| AFUA_1G11390 | -1.10 | 0.002 | 0.045 | XP_752504.1 | cytochrome P450                                          |
| AFUA_3G03190 | -1.09 | 0.047 | 0.000 | XP_748638.1 | MFS multidrug transporter                                |
| AFUA_3G04050 | -1.08 | 0.007 | 0.000 | XP_748725.1 | conserved hypothetical protein                           |
| AFUA_1G11910 | -1.07 | 0.007 | 0.024 | XP_752557.1 | conserved histidine-rich protein                         |
| AFUA_3G08550 | -1.03 | 0.012 | 0.005 | XP_754760.1 | short-chain dehydrogenase/reductase family protein       |
| AFUA_1G17140 | -1.02 | 0.012 | 0.034 | XP_753082.1 | voltage-gated K <sup>+</sup> channel beta subunit (KCNA) |
| AFUA_5G11330 | -1.02 | 0.005 | 0.023 | XP_753516.1 | conserved hypothetical protein                           |

---

|              |       |       |       |             |                                   |
|--------------|-------|-------|-------|-------------|-----------------------------------|
| AFUA_5G12620 | -1.00 | 0.007 | 0.009 | XP_753391.1 | CorA family metal ion transporter |
|--------------|-------|-------|-------|-------------|-----------------------------------|

---
