# Supplementary material for: Transcriptomic and Functional Studies of the RGS Protein Rax1 in Aspergillus fumigatus
Source: MDPI journal article supplement (doi:10.3390/pathogens9010036), 2019-12-31
Supplement: s1 [file s1]

**Table S1.** Up-regulated genes in *ΔraxI* relative to WT (> 2.0-fold,  $p < 0.05$ ).

| Gene name    | Log <sub>2</sub> FC | <i>p</i> -value | <i>q</i> -value | Protein product | Protein name                                               |
|--------------|---------------------|-----------------|-----------------|-----------------|------------------------------------------------------------|
| AFUA_1G15100 | 3.92                | 0.000           | 0.029           | XP_752879.1     | EBP domain protein                                         |
| AFUA_3G03080 | 3.81                | 0.004           | 0.000           | XP_748630.1     | endo-1,3(4)-beta-glucanase                                 |
| AFUA_1G14480 | 3.42                | 0.013           | 0.000           | XP_752817.1     | hypothetical protein AFUA_1G14480                          |
| AFUA_6G08500 | 2.89                | 0.002           | 0.046           | XP_750739.2     | phosphoglycerate mutase family protein                     |
| AFUA_5G03770 | 2.88                | 0.000           | 0.035           | XP_747967.1     | lipase                                                     |
| AFUA_4G06620 | 2.87                | 0.000           | 0.009           | XP_752164.1     | Glutamate/Leucine/Phenylalanine/Valine dehydrogenase       |
| AFUA_2G17920 | 2.73                | 0.002           | 0.001           | XP_756129.1     | conserved hypothetical protein                             |
| AFUA_1G14190 | 2.70                | 0.005           | 0.012           | XP_752789.1     | DUF614 domain protein                                      |
| AFUA_4G01270 | 2.68                | 0.000           | 0.030           | XP_746331.1     | integral membrane protein                                  |
| AFUA_1G14540 | 2.68                | 0.002           | 0.000           | XP_752823.1     | oxidoreductase, short-chain dehydrogenase/reductase family |
| AFUA_1G15070 | 2.50                | 0.000           | 0.016           | XP_752876.1     | mtDNA inheritance protein Dml1                             |
| AFUA_1G15180 | 2.48                | 0.000           | 0.001           | XP_752887.1     | conserved hypothetical protein                             |
| AFUA_8G01110 | 2.45                | 0.010           | 0.034           | XP_747095.1     | integral membrane protein                                  |
| AFUA_1G14640 | 2.39                | 0.004           | 0.023           | XP_752833.1     | conserved hypothetical protein                             |
| AFUA_1G14130 | 2.34                | 0.005           | 0.013           | XP_752783.1     | conserved hypothetical protein                             |
| AFUA_1G14600 | 2.27                | 0.010           | 0.007           | XP_752829.1     | transcription initiation factor TFIID, 31kD subunit        |
| AFUA_3G06020 | 2.26                | 0.000           | 0.000           | XP_755004.1     | glyoxalase family protein                                  |
| AFUA_3G00680 | 2.25                | 0.000           | 0.017           | XP_748389.1     | copper amine oxidase                                       |
| AFUA_3G01360 | 2.08                | 0.000           | 0.000           | XP_748457.1     | siderochrome-iron transporter                              |
| AFUA_5G08180 | 2.05                | 0.000           | 0.000           | XP_753818.1     | cell wall protein                                          |
| AFUA_1G13830 | 1.96                | 0.018           | 0.004           | XP_752753.1     | threonine-rich protein                                     |

|              |      |       |       |                |                                       |
|--------------|------|-------|-------|----------------|---------------------------------------|
| AFUA_3G00620 | 1.96 | 0.046 | 0.000 | XP_748382.1    | zinc-containing alcohol dehydrogenase |
| AFUA_4G09600 | 1.90 | 0.000 | 0.003 | XP_751866.1    | GPI anchored protein                  |
| AFUA_4G13800 | 1.83 | 0.001 | 0.004 | XP_751452.2    | extracellular sialidase/neuraminidase |
| AFUA_8G01860 | 1.82 | 0.004 | 0.002 | XP_747020.2    | NmrA-like family protein              |
| AFUA_8G01960 | 1.82 | 0.014 | 0.003 | XP_747010.1    | conserved hypothetical protein        |
| AFUA_7G06440 | 1.80 | 0.003 | 0.023 | XP_748866.1    | F-box domain protein                  |
| AFUA_8G02250 | 1.79 | 0.000 | 0.000 | XP_746981.1    | conserved hypothetical protein        |
| AFUA_5G02770 | 1.78 | 0.000 | 0.000 | XP_748065.1    | conserved hypothetical protein        |
| AFUA_6G03870 | 1.77 | 0.000 | 0.000 | XP_747690.2    | tetratricopeptide repeat protein      |
| AFUA_1G13980 | 1.77 | 0.003 | 0.000 | XP_752768.1    | conserved hypothetical protein        |
| AFUA_1G15200 | 1.74 | 0.000 | 0.026 | XP_752889.1    | Hsp70 family protein                  |
| AFUA_1G14490 | 1.71 | 0.003 | 0.000 | XP_752818.1    | aminotransferase                      |
| AFUA_1G17290 | 1.66 | 0.000 | 0.000 | XP_753097.1    | conserved hypothetical protein        |
| AFUA_3G12982 | 1.65 | 0.002 | 0.045 | XP_001481626.1 | extracellular serine rich protein     |
| AFUA_4G06610 | 1.65 | 0.000 | 0.005 | XP_752165.1    | conserved hypothetical protein        |
| AFUA_8G00160 | 1.64 | 0.000 | 0.000 | XP_747188.1    | conserved hypothetical protein        |
| AFUA_6G07150 | 1.60 | 0.000 | 0.000 | XP_750608.1    | actin binding protein                 |
| AFUA_1G14770 | 1.59 | 0.015 | 0.004 | XP_752846.1    | tRNA dihydrouridine synthase          |
| AFUA_2G17140 | 1.59 | 0.000 | 0.001 | XP_756048.1    | conserved hypothetical protein        |
| AFUA_1G14440 | 1.57 | 0.000 | 0.009 | XP_752814.1    | cation diffusion facilitator 1        |
| AFUA_1G16620 | 1.56 | 0.000 | 0.044 | XP_753029.1    | C6 transcription factor               |
| AFUA_3G03960 | 1.53 | 0.002 | 0.027 | XP_748716.1    | conserved hypothetical protein        |
| AFUA_1G17310 | 1.53 | 0.000 | 0.000 | XP_753099.1    | MFS lactose permease                  |

|              |      |       |       |                |                                             |
|--------------|------|-------|-------|----------------|---------------------------------------------|
| AFUA_2G10480 | 1.53 | 0.001 | 0.002 | XP_755381.2    | conserved hypothetical protein              |
| AFUA_5G06790 | 1.50 | 0.001 | 0.009 | XP_753954.1    | conserved hypothetical protein              |
| AFUA_2G05635 | 1.49 | 0.002 | 0.000 | XP_001481660.1 | hypothetical protein AFUA_2G05635           |
| AFUA_3G00280 | 1.48 | 0.001 | 0.015 | XP_748350.1    | metallo-beta-lactamase domain protein       |
| AFUA_1G01000 | 1.48 | 0.021 | 0.046 | XP_749850.1    | oxidoreductase, 2OG-Fe(II) oxygenase family |
| AFUA_8G01540 | 1.46 | 0.012 | 0.014 | XP_747052.1    | hypothetical protein AFUA_8G01540           |
| AFUA_2G03780 | 1.46 | 0.007 | 0.013 | XP_749510.1    | conserved hypothetical protein              |
| AFUA_2G01610 | 1.45 | 0.001 | 0.000 | XP_749296.1    | conserved hypothetical protein              |
| AFUA_8G00200 | 1.44 | 0.000 | 0.022 | XP_747184.1    | O-methyltransferase                         |
| AFUA_4G14810 | 1.42 | 0.002 | 0.008 | XP_751352.2    | cytochrome P450 monooxygenase               |
| AFUA_4G01550 | 1.41 | 0.033 | 0.000 | XP_746302.1    | aldehyde dehydrogenase                      |
| AFUA_3G01370 | 1.39 | 0.014 | 0.011 | XP_748458.1    | MFS transporter                             |
| AFUA_2G15450 | 1.38 | 0.017 | 0.030 | XP_755880.2    | conserved hypothetical protein              |
| AFUA_1G11010 | 1.33 | 0.004 | 0.023 | XP_752466.1    | short chain oxidoreductase/dehydrogenase    |
| AFUA_3G13700 | 1.32 | 0.006 | 0.016 | XP_754254.1    | transferase family protein                  |
| AFUA_5G01360 | 1.31 | 0.005 | 0.007 | XP_748206.1    | cytochrome P450                             |
| AFUA_6G05160 | 1.29 | 0.003 | 0.000 | XP_747561.1    | C2H2 transcription factor (Azf1)            |
| AFUA_4G04170 | 1.25 | 0.021 | 0.009 | XP_746603.1    | conserved hypothetical protein              |
| AFUA_4G11602 | 1.25 | 0.004 | 0.030 | XP_001481570.1 | conserved hypothetical protein              |
| AFUA_4G14360 | 1.23 | 0.003 | 0.000 | XP_751396.1    | capsule associated protein                  |
| AFUA_6G06950 | 1.22 | 0.014 | 0.004 | XP_750588.2    | conserved hypothetical protein              |
| AFUA_1G17240 | 1.21 | 0.030 | 0.044 | XP_753092.1    | C6 transcription factor                     |
| AFUA_5G08270 | 1.20 | 0.002 | 0.000 | XP_753809.1    | HAD superfamily hydrolase                   |

|              |      |       |       |                |                                                     |
|--------------|------|-------|-------|----------------|-----------------------------------------------------|
| AFUA_1G10420 | 1.20 | 0.011 | 0.009 | XP_752408.1    | hypothetical protein AFUA_1G10420                   |
| AFUA_1G14110 | 1.20 | 0.014 | 0.011 | XP_752781.1    | RNA polymerase subunit                              |
| AFUA_8G00150 | 1.20 | 0.028 | 0.009 | XP_747189.1    | conserved hypothetical protein                      |
| AFUA_1G17260 | 1.19 | 0.008 | 0.025 | XP_753094.1    | hypothetical protein AFUA_1G17260                   |
| AFUA_5G10890 | 1.19 | 0.011 | 0.000 | XP_753557.2    | DNA replication licensing factor Mcm6               |
| AFUA_2G14790 | 1.18 | 0.017 | 0.004 | XP_755811.1    | conserved hypothetical protein                      |
| AFUA_6G07855 | 1.18 | 0.030 | 0.000 | XP_001481458.1 | conserved threonine rich protein                    |
| AFUA_5G10240 | 1.16 | 0.009 | 0.023 | XP_753617.1    | conserved hypothetical protein                      |
| AFUA_7G01030 | 1.16 | 0.036 | 0.000 | XP_746828.1    | calcium transporting ATPase (Pmc1)                  |
| AFUA_8G05280 | 1.15 | 0.004 | 0.000 | XP_747330.1    | RNA interference and gene silencing protein (Qde2)  |
| AFUA_4G03690 | 1.14 | 0.043 | 0.041 | XP_746556.2    | aldehyde dehydrogenase family protein               |
| AFUA_6G11300 | 1.13 | 0.013 | 0.003 | XP_751014.1    | integral membrane channel protein                   |
| AFUA_4G08600 | 1.12 | 0.005 | 0.000 | XP_751967.1    | aldehyde dehydrogenase                              |
| AFUA_3G07120 | 1.12 | 0.009 | 0.012 | XP_754894.1    | MFS transporter                                     |
| AFUA_3G07945 | 1.10 | 0.018 | 0.042 | XP_001481611.1 | conserved hypothetical protein                      |
| AFUA_2G05380 | 1.09 | 0.023 | 0.030 | XP_749668.1    | C6 transcription factor                             |
| AFUA_1G16240 | 1.06 | 0.024 | 0.000 | XP_752990.1    | TIM barrel metal-dependent hydrolase                |
| AFUA_5G13970 | 1.06 | 0.020 | 0.001 | XP_753259.2    | WD domain, G-beta repeat protein                    |
| AFUA_7G08650 | 1.04 | 0.021 | 0.019 | XP_748750.1    | conserved hypothetical protein                      |
| AFUA_1G17280 | 1.04 | 0.021 | 0.038 | XP_753096.1    | conserved hypothetical protein                      |
| AFUA_8G06810 | 1.02 | 0.022 | 0.000 | XP_747480.1    | hypothetical protein AFUA_8G06810                   |
| AFUA_2G16830 | 1.02 | 0.028 | 0.000 | XP_756020.1    | endonuclease/exonuclease/phosphatase family protein |
| AFUA_5G05590 | 1.01 | 0.022 | 0.000 | XP_754072.1    | aspartokinase                                       |

---

|              |      |       |       |             |                                              |
|--------------|------|-------|-------|-------------|----------------------------------------------|
| AFUA_4G12070 | 1.01 | 0.021 | 0.019 | XP_751624.1 | endosomal peripheral membrane protein (Mon2) |
| AFUA_3G08500 | 1.00 | 0.021 | 0.001 | XP_754764.1 | morphogenesis protein (Msb1)                 |

---
