# Supplementary material for: Transcriptomic and Functional Studies of the RGS Protein Rax1 in Aspergillus fumigatus
Source: MDPI journal article supplement (doi:10.3390/pathogens9010036), 2019-12-31
Supplement: s1 [file s1]

**Table S3.** Oligonucleotides used in this study.

| Name      | Sequence (5'→3')      | Purpose                                          |
|-----------|-----------------------|--------------------------------------------------|
| oligo346  | CCATGTGTGTCGAGTCCTTC  | 5' <i>efl</i> $\alpha$ for qRT-PCR normalization |
| oligo347  | GAACGTACAGCAACAGTCTGG | 3' <i>efl</i> $\alpha$ for qRT-PCR normalization |
| oligo691  | CGATCTGTACCCCAACGAGT  | 5' <i>gliM</i> for qRT-PCR                       |
| oligo692  | TTCTGGAACTTTGCCAGCTT  | 3' <i>gliM</i> for qRT-PCR                       |
| oligo1112 | ACTCAGGTCATGGTGGTCAG  | 5' <i>casA</i> for qRT-PCR                       |
| oligo1113 | AAGTCGACCGGGTAGATGAC  | 3' <i>casA</i> for qRT-PCR                       |
| oligo1114 | ACGACGTCATCTACCCTGTC  | 5' <i>casB</i> for qRT-PCR                       |
| oligo1115 | GCGAGGTTTCGGTTCTTTCAA | 3' <i>casB</i> for qRT-PCR                       |
